# Supplementary material
Source: MDPI journal article supplement (https://www.mdpi.com/2073-4395/13/12/2956)
Supplement: s1 [file s1]

| Oligo Name                                                                | Sequence 5' to 3'                                         | Scale (μmole) |
|---------------------------------------------------------------------------|-----------------------------------------------------------|---------------|
| <b>Oligonucleotides for HindIII-FspBI digestion of <i>Zea mays</i></b>    |                                                           |               |
| P1.1_HindIII_bar01                                                        | ACACTCTTTCCCTACACGACGCTCTTCCGATCTAACT                     | 0.05          |
| P1.1_HindIII_bar02                                                        | ACACTCTTTCCCTACACGACGCTCTTCCGATCTCCAAG                    | 0.05          |
| P1.1_HindIII_bar03                                                        | ACACTCTTTCCCTACACGACGCTCTTCCGATCTTTGCAA                   | 0.05          |
| P1.1_HindIII_bar04                                                        | ACACTCTTTCCCTACACGACGCTCTTCCGATCTGGTGCCA                  | 0.05          |
| P1.1_HindIII_bar05                                                        | ACACTCTTTCCCTACACGACGCTCTTCCGATCTAACAACGT                 | 0.05          |
| P1.1_HindIII_bar06                                                        | ACACTCTTTCCCTACACGACGCTCTTCCGATCTCCACCATG                 | 0.05          |
| P1.1_HindIII_bar07                                                        | ACACTCTTTCCCTACACGACGCTCTTCCGATCTTTGTTGCA                 | 0.05          |
| P1.1_HindIII_bar08                                                        | ACACTCTTTCCCTACACGACGCTCTTCCGATCTCGTGGTAA                 | 0.05          |
| P1.2_HindIII_bar01                                                        | AGCTAGTTAGATCGGAAGAGCGTCGTGTAGGGAAAGAGTGT                 | 0.05          |
| P1.2_HindIII_bar02                                                        | AGCTCTTGAGATCGGAAGAGCGTCGTGTAGGGAAAGAGTGT                 | 0.05          |
| P1.2_HindIII_bar03                                                        | AGCTTTGCAAAGATCGGAAGAGCGTCGTGTAGGGAAAGAGTGT               | 0.05          |
| P1.2_HindIII_bar04                                                        | AGCTTGGCACCAGATCGGAAGAGCGTCGTGTAGGGAAAGAGTGT              | 0.05          |
| P1.2_HindIII_bar05                                                        | AGCTTGTTAGATCGGAAGAGCGTCGTGTAGGGAAAGAGTGT                 | 0.05          |
| P1.2_HindIII_bar06                                                        | AGCTCATGGTGGAGATCGGAAGAGCGTCGTGTAGGGAAAGAGTGT             | 0.05          |
| P1.2_HindIII_bar07                                                        | AGCTTGCAACAAAGATCGGAAGAGCGTCGTGTAGGGAAAGAGTGT             | 0.05          |
| P1.2_HindIII_bar08                                                        | AGCTTTACCACGAGATCGGAAGAGCGTCGTGTAGGGAAAGAGTGT             | 0.05          |
| P2.1_FspBI                                                                | GTGACTGGAGTTCAGACGTGTGCTCTTCCGATCT                        | 0.05          |
| P2.2_FspBI                                                                | TAAGATCGGAAGAGCGAGAACAA                                   | 0.05          |
| <b>Oligonucleotides for PstI-MspI digestion of <i>Hordeum vulgare</i></b> |                                                           |               |
| P1.1_PstI_bar01                                                           | ACACTCTTTCCCTACACGACGCTCTTCCGATCTAACTTGCA                 | 0.05          |
| P1.1_PstI_bar02                                                           | ACACTCTTTCCCTACACGACGCTCTTCCGATCTCCAAGTGCA                | 0.05          |
| P1.1_PstI_bar03                                                           | ACACTCTTTCCCTACACGACGCTCTTCCGATCTTTGCAATGCA               | 0.05          |
| P1.1_PstI_bar04                                                           | ACACTCTTTCCCTACACGACGCTCTTCCGATCTGGTGCCATGCA              | 0.05          |
| P1.1_PstI_bar05                                                           | ACACTCTTTCCCTACACGACGCTCTTCCGATCTAACAACGTTGCA             | 0.05          |
| P1.1_PstI_bar06                                                           | ACACTCTTTCCCTACACGACGCTCTTCCGATCTCCACCATGTGCA             | 0.05          |
| P1.1_PstI_bar07                                                           | ACACTCTTTCCCTACACGACGCTCTTCCGATCTTTGTTGCATGCA             | 0.05          |
| P1.1_PstI_bar08                                                           | ACACTCTTTCCCTACACGACGCTCTTCCGATCTCGTGGTAATGCA             | 0.05          |
| P1.2_PstI_bar01                                                           | AGTTAGATCGGAAGAGCGTCGTGTAGGGAAAGAGTGT                     | 0.05          |
| P1.2_PstI_bar02                                                           | CTTGAGATCGGAAGAGCGTCGTGTAGGGAAAGAGTGT                     | 0.05          |
| P1.2_PstI_bar03                                                           | TTGCAAAGATCGGAAGAGCGTCGTGTAGGGAAAGAGTGT                   | 0.05          |
| P1.2_PstI_bar04                                                           | TGGCACCAGATCGGAAGAGCGTCGTGTAGGGAAAGAGTGT                  | 0.05          |
| P1.2_PstI_bar05                                                           | ACGTTGTTAGATCGGAAGAGCGTCGTGTAGGGAAAGAGTGT                 | 0.05          |
| P1.2_PstI_bar06                                                           | CATGGTGGAGATCGGAAGAGCGTCGTGTAGGGAAAGAGTGT                 | 0.05          |
| P1.2_PstI_bar07                                                           | TGCAACAAAGATCGGAAGAGCGTCGTGTAGGGAAAGAGTGT                 | 0.05          |
| P1.2_PstI_bar08                                                           | TTACCACGAGATCGGAAGAGCGTCGTGTAGGGAAAGAGTGT                 | 0.05          |
| P2.1_MspI                                                                 | GTGACTGGAGTTCAGACGTGTGCTCTTCCGATCT                        | 0.05          |
| P2.2_MspI                                                                 | CGAGATCGGAAGAGCGAGAACAA                                   | 0.05          |
| <b>Illumina adapter sequences</b>                                         |                                                           |               |
| ILLPCR1                                                                   | AATGATACGGCGACCACCGAGATCTACACTCTTTCCCTACACGACG            | 0.05          |
| ILLPCR2_ind01                                                             | CAAGCAGAAGACGGCATACGAGATCGTGATGTGACTGGAGTTCAGA<br>CGTGTGC | 0.05          |
| ILLPCR2_ind02                                                             | CAAGCAGAAGACGGCATACGAGATACATCGGTGACTGGAGTTCAGA<br>CGTGTGC | 0.05          |

|               |                                                        |      |
|---------------|--------------------------------------------------------|------|
| ILLPCR2_ind03 | CAAGCAGAAGACGGCATAACGAGATGCCTAAGTGACTGGAGTTCAGACGTGTGC | 0.05 |
| ILLPCR2_ind04 | CAAGCAGAAGACGGCATAACGAGATTGGTCAGTGACTGGAGTTCAGACGTGTGC | 0.05 |
| ILLPCR2_ind05 | CAAGCAGAAGACGGCATAACGAGATCACTGTGTGACTGGAGTTCAGACGTGTGC | 0.05 |
| ILLPCR2_ind06 | CAAGCAGAAGACGGCATAACGAGATATTGGCGTGACTGGAGTTCAGACGTGTGC | 0.05 |
| ILLPCR2_ind07 | CAAGCAGAAGACGGCATAACGAGATGATCTGGTGACTGGAGTTCAGACGTGTGC | 0.05 |
| ILLPCR2_ind08 | CAAGCAGAAGACGGCATAACGAGATTCAAGTGACTGGAGTTCAGACGTGTGC   | 0.05 |
| ILLPCR2_ind09 | CAAGCAGAAGACGGCATAACGAGATCTGATCGTGACTGGAGTTCAGACGTGTGC | 0.05 |
| ILLPCR2_ind10 | CAAGCAGAAGACGGCATAACGAGATAAGCTAGTGACTGGAGTTCAGACGTGTGC | 0.05 |
| ILLPCR2_ind11 | CAAGCAGAAGACGGCATAACGAGATGTAGCCGTGACTGGAGTTCAGACGTGTGC | 0.05 |
| ILLPCR2_ind12 | CAAGCAGAAGACGGCATAACGAGATTACAAGGTGACTGGAGTTCAGACGTGTGC | 0.05 |
